# Supplementary material
Source: PubMed Central journal article supplement (PMC5126504)
Supplement: NIHMS831035-supplement-01.pdf [file NIHMS831035-supplement-01.pdf]

**Optional E-Only Supplementary Files**

[Click here to download Optional E-Only Supplementary Files: PRD Letter Abstract 10-4-15.docx](#)
